# Supplementary material for: Treatment Effect Estimates in Randomised Trials With Ai-augmented Control Arms
Source: Research Square preprint supplement (doi:10.21203/rs.3.rs-8223779/v1), 2025-12-16
Supplement: Supplementary file 1 [file 567ab6b4964bdacbf2269257.docx]

# Appendix A. Detailed methods

Data.
We used the data from two large RCTs, the International Stroke Trial (IST) and the third International Stroke Trial (IST3). We reported the baselines characteristics used to train the generative models in the eTable 4 and eTable 5.

From the raw IST data, a new variable, was constructed to capture whether a patient was dead or dependent at 6 months using the variable *FDEAD* and *FDENNIS*. Countries were categorized into broad geographic areas (Europe, South America, North America, the Middle East, North Asia, South Asia, Africa, and Oceania). Missing data were addressed using multiple imputation chained equations.

IST is an RCT of 19,435 patients with acute ischaemic stroke assessing the safety and efficacy of aspirin and subcutaneous heparin on death or dependency at 6 months. The design of IST is factorial with four arms (aspirin, heparin, aspirin and heparin, none), moreover no interaction was found between the two treatments. We consider the aspirin versus avoid aspirin analysis in this study, hence, we used an experimental arm (aspirin) composed of 9720 patients and a control arm (no aspirin) of 9715 patients.

IST3 is an RCT of 3,035 patients with acute ischemic stroke assessing the safety and efficacy of intravenous thrombolysis with recombinant tissue plasminogen activator within 6 hours against standard of care (with the exception of 300 patients in the early phase that received a placebo) on death or dependency at 6 months.

Architectures.
In machine learning, the nature of data determines which type of algorithms can be used, in this case: randomized controlled trials data are tabular and contains categorical covariates.

In our study we used two state-of-the-art latent space based generative models for tabular data with categorical and continuous features.

CTGANwhich is based on Generative Adversarial Networks (GAN); an architecture consisting of two interlinked neural networks - the generator and the discriminator. These are jointly trained in an adversarial manner: the generator aims to produce realistic synthetic data starting from random noise while the discriminator seeks to differentiate between real data and the generated synthetic samples. The training continues until the discriminator is no longer able to reliably distinguish real data from synthetic one

TVAEwhich is based on Variational Autoencoders (VAE); an architecture also composed of two interlinked neural networks - the encoder and the decoder. The encoder maps the input data to a latent space typically of smaller dimension while the decoder maps this latent space back to the input space. The training is performed by maximizing the Evidence Lower Bound (ELBO) which is a lower bound of the log-likelihood of the data. Our implementation used a prior sampling.

The specificity of CTGAN and TVAE is their pre-processing of the tabular data allowing the aforementioned neural networks to approximate the distribution of the data despite the categorical nature of some of the features. Both architectures are implemented in the Synthetic Data Vault (SDV) library and are two state of the art among the well-established recent architectures.

Evaluation of synthetic data.The evaluation of the quality of the generated data was performed using the SDMetrics general score. This score is the mean of all column score and all column pair score defined as follows. The column score is given by a Kolmogorov-Smirnov test for numerical columns and a total variation distance for categorical columns. The evaluation of the column pair trends is performed with a Pearson coefficient for numerical columns, a normalized contingency table for categorical columns, a normalized contingency table for mixed type columns (the numerical column is discretised into bins).

Sampling procedure.
In each trial, we estimated the treatment effect obtained by a stop if patient recruitment had been stopped after *n*-patients with further patients being generated by artificial intelligence. We trained different models and distinguish two sampling procedures: ***the one-shot procedure***where we simulated 1 augmented trial data where the missing patients' data from the original trial were replaced by generated patient data and analyse this data as if they would have been obtained from a randomised controlled trial; ***the averaged procedure*** where we simulated 999 augmented trial data where the missing patients' data from the original trial were replaced by generated patient data the arising 999 treatment effect and 999 standard error were averaged (Figure 1 panel A).

The use of the average procedure is justified as, once a model is trained, it is computationally costless to generate more augmented trial data. The averaging of estimates aims to limit the consequence of the sampling inherent to the GAN and VAE architectures and therefore reflect the *learned* treatment effect and standard error.

Statistical analysis
In a randomized controlled trial context, the difference of means is an unbiased and consistent estimator of the treatment effect. The object of our analysis is to point out the discrepancy between treatment effect estimated via the difference of means using the data of an RCT or using the data of a controlled-augmented trial.

We start by introducing notations to describe our statistical methodology. For any positive integer we write for the set . Consider a RCT of size with covariate space , primary outcome space . The data of the RCT is denoted where and the patient data is denoted where are covariates, her binary primary outcome and her treatment assignment. Let and be respectively the size of the control group and experimental group and denote similarly the control group data.

The dataset (resp. ) induces an empirical distribution (resp. ) on . If denote by the conditional empirical expectation for . The treatment effect estimated in the RCT is given by and denote by its variance.

Control group data and generative processIn this subsection, we formalise the generative process of control patient data.

A training set of size is given by where is an injection. Here, the training set will be composed (1) in the case of stop in control recruitment of the data of the first patients and (2) in the random removal case of the data of patients drawn without replacement from .
A generative model with trainable parameters, a latent space of dimension , is specified by the triple where corresponds to a training-to-parameters application and maps a set of parameters to a generator function that satisfies

and . In particular, is the decoder in a VAE or the generator in a GAN. The sampling prior is a probability distribution on the latent space .

Note that we include the training process in our description of a generative model as this training process plays a key role in our subsequent analysis.

Estimations
Here, for the sake of illustration, we assume that the generative model learned the eligible joint population distribution and that generated patient data are equivalent to hypothetically recruited patient data, which is the rationale that underpins the use of augmentation methods trained solely trial's information. In particular, data are analysed as if they would be from a standard trial.

We will define the estimators and respectively used to measure the treatment effect in the one-shot and averaged procedures.

The randomized controlled trial estimates the treatment effect with its associated confidence interval where

and is the quantile from .

For the sake of brevity, we denote by the vector of primary outcomes arising from the RCT data and write for the primary outcomes data from where is such that and , namely the generated patient data.

In the one-shot procedure we denote the mean and variance in the control-augmented trial respectively by

We studied the -estimator given by and the confidence interval given by where

In the averaged procedure, let i.i.d and denote by the vectors of primary outcome from where is such that the generated primary outcomes of the . We denote the empirical mean and empirical variance of the trial by

We studied the and estimators respectively given by

The associated confidence interval is given by where

As both IST and IST3 failed to provide evidence of a significative treatment effect, we say that the control augmented trial has *significance disagreement* with the original RCT if the interval does not contain zero.

Moreover, we say that the control augmented trial admits an *incompatible result* with the original RCT if and are disjoint.

In the random removal control group patient data augmentation, we sampled several training sets. For i.i.d, we looked at as an estimator of .

ExperimentsThe -first control group patients data augmentation aims to reproduce a stop after the recruitment of the -first control group patients and the completion of this group by generated patient data. The random removal control group data augmentation aims to estimate further the impact of a change in case-mix by simulating different recruitment scenarios.

We realised a total of eight different cases characterized by a triplet given by a reference RCT, a training set size and a generative AI architecture. We ran both scenarios -first and random removal control group patients' data augmentations for each case. Here, we describe the exact protocol for each of these scenarios.

n-first control group patient's data augmentation
We created a training set composed of the data from the first patients included in the control arm of the reference trial. We implemented a hyperparameters tuning with a 5-fold cross-validation gridsearch to avoid overfitting. The grids are summarized in eTable [4](#tab:gs). We selected the set of hyperparameters implemented in SDV that lead to the best SDMetrics general score to train one model. In the case of CTGAN the optimal epochs number hyperparameter was estimated from the generator loss stabilization point.

From the model control-augmented trial data were created, each one of them composed of a control arm that is the concatenation of the training set and the patients' data generated by the model and an experimental arm that is the experimental arm from the reference RCT (see Figure [1](#fig:fig) panel A). We computed the estimators and with their confidence interval and represented them in (Figure [1](#fig:fig) panel B).

Random removal control group patient's data augmentationWe aim to replicate different recruitment scenarios by sampling groups of -first recruited patients' data among the RCT control group data.

A gridsearch hyperparameter tuning approach for the patients similar to the one we did in the -first control group data augmentation scenario is not computationally tractable. Hence, to avoid overfitting, we drawn uniformly from the control group data three training sets of size and used a gridsearch approach with a 5-fold cross-validation hyperparameters tuning of the different models on each of the three training sets. Then, we selected averaged SDMetrics general score of each hyperparameter combination over the training set and chose the hyperparameters leading to the best averaged score. The grids considered are summarized in eTable [6](#tab:gs). In the case of CTGAN the optimal epochs number hyperparameter was estimated from the generator loss stabilization point.

We drew uniformly from the control group data training sets of size which lead to 1000 different models. Every model generated 999 augmented trial data that are composed of a control arm that is the concatenation of the training set and the patient data generated by the model and an experimental arm that is the experimental arm from the reference RCT (see Figure[1](#fig:fig) panel A).

We computed the estimators and for every with their confidence interval and represented of them in the panel C from Figure [1](#fig:fig). We also computed the number of these trial admitting statistical disagreement and the number admitting incompatible results and reported it in Table[1](#tab:sensitivity) and eTable 1.

Hardware and software used for trainingThe experiments including, hyperparameter tuning and analyses were performed on an HP OMEN 45l GT22-3090 with an Intel® Core™ Ultra 9 285K, 3700 Mhz CPU and a NVIDIA GeForce RTX 4090 GPU. We used Python 3.12.2 with a pip installed sdv version 1.12.1 using a torch version adapted for cuda 12.4.

| **Architecture** | **TVAE** | | | |
| --- | --- | --- | --- | --- |
| **Trial** | **IST** | | **IST3** | |
| **Training dataset size** | **1000** | **5000** | **380** | **760** |
| Compress dimension | 1024 | 2048 | 1024 | 2048 |
| Decompress dimension | 1024 | 2048 | 2048 | 512 |
| Embedding dimension | 8 | 4 | 8 | 8 |
| Batch size | 300 | 100 | 100 | 100 |
| Loss factor | 4 | 2 | 2 | 4 |
| Epochs | 1000 | 1000 | 1000 | 1000 |
| l2-scale | 1e-5 | 1e-5 | 1e-5 | 1e-5 |
| **Architecture** | **CTGAN** | | | |
| **Trial** | **IST** | | **IST3** | |
| **Training dataset size** | **1000** | **5000** | **380** | **760** |
| Generator dimension | 512 | 256 | 512 | 128 |
| Discriminator dimension | 512 | 1024 | 256 | 1024 |
| Embedding dimension | 16 | 16 | 16 | 8 |
| Batch size | 100 | 500 | 500 | 100 |
| Step | 5 | 5 | 5 | 3 |
| Epochs | 400 | 400 | 700 | 500 |
| Discriminator decay | 1e-6 | 1e-6 | 1e-6 | 1e-6 |
| Discriminator learning rate | 2e-5 | 2e-5 | 2e-5 | 2e-5 |
| Generator decay | 1e-6 | 1e-6 | 1e-6 | 1e-6 |
| Generator learning rate | 2e-5 | 2e-5 | 2e-5 | 2e-5 |
| Log-frequency | False | False | False | False |

*eTable 1. Hyperparameters of the n-first control group training.*

| **Architecture** | **TVAE** | | | |
| --- | --- | --- | --- | --- |
| **Trial** | **IST** | | **IST3** | |
| **Training dataset size** | **1000** | **5000** | **380** | **760** |
| Compress dimension | 2048 | 1024 | 1024 | 2048 |
| Decompress dimension | 1024 | 1024 | 1024 | 2048 |
| Embedding dimension | 8 | 8 | 8 | 8 |
| Batch size | 100 | 100 | 100 | 100 |
| Loss factor | 4 | 2 | 4 | 2 |
| Epochs | 500 | 500 | 500 | 500 |
| l2-scale | 1e-5 | 1e-5 | 1e-5 | 1e-5 |
| **Architecture** | **CTGAN** | | | |
| **Trial** | **IST** | | **IST3** | |
| **Training dataset size** | **1000** | **5000** | **380** | **760** |
| Generator dimension | 512 | 128 | 128 | 128 |
| Discriminator dimension | 1024 | 256 | 512 | 256 |
| Embedding dimension | 8 | 16 | 8 | 16 |
| Batch size | 100 | 100 | 100 | 100 |
| Step | 5 | 5 | 5 | 5 |
| Epochs | 400 | 220 | 700 | 500 |
| Discriminator decay | 1e-6 | 1e-6 | 1e-6 | 1e-6 |
| Discriminator learning rate | 2e-5 | 2e-5 | 2e-5 | 2e-5 |
| Generator decay | 1e-6 | 1e-6 | 1e-6 | 1e-6 |
| Generator learning rate | 2e-5 | 2e-5 | 2e-5 | 2e-5 |
| Log-frequency | False | False | False | False |

*eTable 2. Hyperparameters of the random removal training.*

| **Architecture** | **CTGAN** | | | |
| --- | --- | --- | --- | --- |
| Compress dimension | 256 | 512 | 1024 | 2048 |
| Decompress dimension | 256 | 512 | 1024 | 2048 |
| Embedding dimension | 4 | 8 |  |  |
| Batch size | 100 | 300 |  |  |
| Loss factor | 2 | 4 |  |  |
| Epochs | 500 |  |  |  |
| l2-scale | 1e-5 |  |  |  |
| **Architecture** | **TVAE** | | | |
| Generator dimension | 128 | 256 | 512 |  |
| Discriminator dimension | 256 | 512 | 1024 |  |
| Embedding dimension | 4 | 8 | 16 |  |
| Batch size | 100 | 500 | 700 |  |
| Step | 1 | 3 | 5 |  |
| Epochs | 1000 |  |  |  |
| Discriminator decay | 1e-6 |  |  |  |
| Discriminator learning rate | 2e-5 |  |  |  |
| Generator decay | 1e-6 |  |  |  |
| Generator learning rate | 2e-5 |  |  |  |
| Log-frequency | False |  |  |  |

*eTable 3. Hyperparameters tested in the gridsearches*

| **IST baseline characteristics include in training** | |
| --- | --- |
| Delay between stroke and randomization (in hours) | Country |
| Sex (M/F) | Leg/foot deficit (Y/N/C) |
| Age (in years) | Dysphasia (Y/N/C) |
| CT before randomisation (Y/N) | Hemianopia (Y/N/C) |
| Infarct visible on CT (Y/N) | Visuospatial disorder (Y/N/C) |
| Systolic blood pressure at randomisation (mmHg) | Brainstem/cerebellar signs (Y/N/C) |
| Atrial fibrillation (Y/N) | Other deficit (Y/N/C) |
| Aspirin within 3 days prior to randomisation (Y/N) | Stroke subtype (TACS/PACS/POCS/LACS/other) |
| Face deficit (Y/N/C) | Region |
| Arm/hand deficit (Y/N/C) |  |

*eTable 4. Baseline characteristics used in the training procedure. The code C correspond to "can't access"*

| **IST3 baseline characteristics include in training** | |
| --- | --- |
| Country | Infarct size (from R scan) |
| Age | Infarcts in ACA / PCA territory |
| Gender | Acute small subcortical infarcts |
| Lived alone before stroke | Acute cortical borderzone infarcts |
| Independent in ADL before stroke | Acute cerebellar infarct |
| Imaging excluded intracranial haemorrhage | Acute brainstem infarct |
| Recent ischaemic change likely causes of this stroke | Anterior cerebral artery affected |
| Received antiplatelet drugs in last 48 hours | Posterior cerebral artery affected |
| Patient in atrial fibrillation at randomisation | Infarct territory (from R scan) |
| Systolic BP at randomisation (mmHg) | Degree of acute hypodensity (R scan) |
| Diastolic BP at randomisation (mmHg) | Degree of tissue swelling in acute infarct (R scan) |
| Estimated weight (kg) | Hyperdense arteries visible on R scan |
| Blood glucose (mmol/L) | Atrophy visible on R scan |
| Best eye response (Glasgow Coma Scale) at randomisation | White matter visible on R scan |
| Best motor response (Glasgow Coma Scale) at randomisation | Old vascular lesion visible on R scan |
| Best verbal response (Glasgow Coma Scale) at randomisation | Non-stroke lesion visible on R scan |
| Total Glasgow Coma Scale score at randomisation | Ischaemic change visible on R scan |
| Total NIH Stroke Score at randomisation | Aspects score for Middle cerebral artery (R scan) |
| Able to lift both arms off bed at randomisation | Total aspects score including ACA/PCA (R scan) |
| Able to walk without help at randomisation | Hyperdensity |
| Unilateral weakness affecting face at randomisation | Aspirin before admission |
| Unilateral weakness affecting arm or hand at randomisation | Dipyridamole before admission |
| Unilateral weakness affecting leg or foot at randomisation | Clopidogrel before admission |
| Dysphasia at randomisation | Low dose heparin before admission |
| Homonymous hemianopia at randomisation | Full dose heparin before admission |
| Visuospatial disorder at randomisation | Warfarin before admission |
| Brainstem or cerebellar signs at randomisation | Other antithrombotic agents before admission |
| Other neurological deficit at randomisation | Treatment for hypertension before admission |
| Stroke subtype | Treatment for diabetes before admission |
| Probability of good outcome based on Konig model | History of previous stroke or TIA |
| R scan normal |  |

*eTable 5. Baseline characteristics used in the training procedure. The code C correspond to "can't access"*


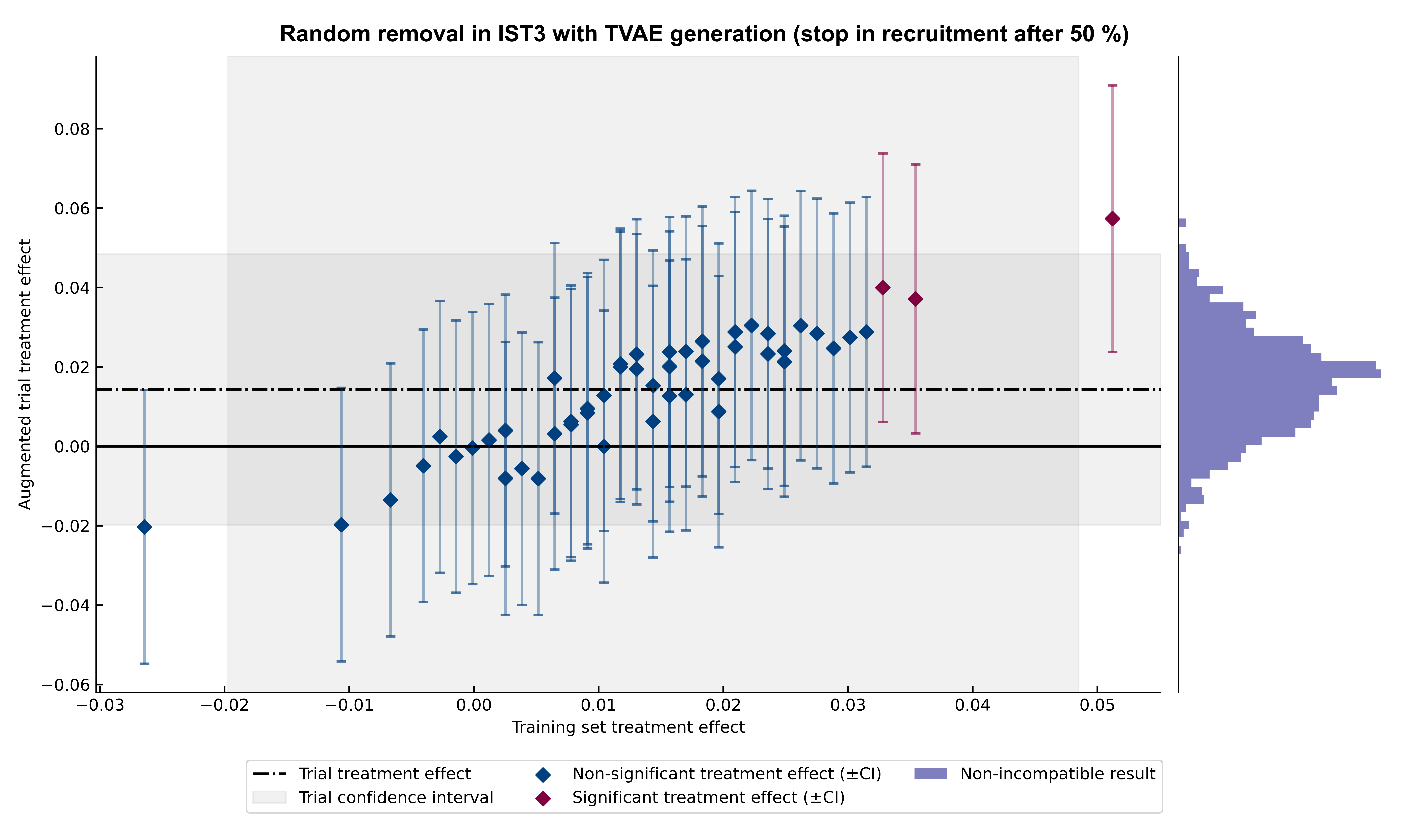
eFigure 1: Treatment effect from augmented trial data (IST3) relatively to treatment effect of their training
